# Supplementary material for: Patient-reported outcome and experience measures for quality improvement in pregnancy and childbirth care: a retrospective cohort study
Source: PubMed Central journal article supplement — BMJ Open Qual. 2023 Mar 8;12(1):e001922. doi: 10.1136/bmjoq-2022-001922 (PMC10008327; doi:10.1136/bmjoq-2022-001922), 2023-03-08
Supplement: bmjoq-2022-001922supp002.pdf [file bmjoq-2022-001922supp002.pdf]

## Appendix B – Baseline characteristics women who delivered in 2018 and 2019 at EMC and respondents

| Case-mix factors                    | All women<br>N = 3292 |              | Survey group<br>N = 645 |              | MD     | P      |
|-------------------------------------|-----------------------|--------------|-------------------------|--------------|--------|--------|
|                                     | N                     | Mean (sd)    | N                       | Mean (sd)    |        |        |
| Age at delivery                     | 3292                  | 31.95 (5.23) | 645                     | 32.86 (4.55) | -1.137 | <0.001 |
| BMI                                 | 2460                  | 25.43 (5.73) | 489                     | 25.22 (5.95) | 0.259  | 0.370  |
|                                     | <b>N</b>              | <b>n (%)</b> | <b>N</b>                | <b>n (%)</b> |        |        |
| Education                           | 994                   |              | 231                     |              |        |        |
| None                                |                       | 15 (1.51)    |                         | 0 (0)        | 0.020  | 0.030  |
| Primary                             |                       | 101 (10.32)  |                         | 7 (3.03)     | 0.095  | <0.001 |
| Secondary                           |                       | 658 (67.21)  |                         | 155 (67.10)  | 0.001  | 0.967  |
| Tertiary (university or equivalent) |                       | 205 (20.94)  |                         | 69 (29.87)   | -0.117 | <0.001 |
| Ethnicity                           | 3268                  |              | 642                     |              |        |        |
| Hindu                               |                       | 95 (2.91)    |                         | 10 (1.56)    | 0.017  | 0.023  |
| Western                             |                       | 1769 (54.13) |                         | 503 (78.35)  | -0.301 | <0.001 |
| Latin American                      |                       | 121 (3.70)   |                         | 9 (1.40)     | 0.029  | <0.001 |
| Turkish                             |                       | 213 (6.52)   |                         | 22 (3.43)    | 0.040  | <0.001 |
| North African                       |                       | 391 (11.96)  |                         | 33 (5.14)    | 0.085  | <0.001 |
| Other African                       |                       | 174 (5.32)   |                         | 6 (0.93)     | 0.055  | <0.001 |
| Asian                               |                       | 156 (4.77)   |                         | 14 (2.18)    | 0.032  | <0.001 |
| Multiple/other                      |                       | 349 (10.68)  |                         | 45 (7.01)    | 0.046  | <0.001 |
| Substance use at start of pregnancy |                       |              |                         |              |        |        |
| Tobacco                             | 2045                  | 321 (15.70)  | 420                     | 49 (11.67)   | 0.051  | 0.011  |
| Alcohol                             | 1973                  | 236 (11.96)  | 403                     | 60 (14.89)   | -0.037 | 0.042  |
| Drugs                               | 1978                  | 38 (1.92)    | 400                     | 5 (1.25)     | 0.008  | 0.274  |
| Medical history                     |                       |              |                         |              |        |        |
| Diabetes Mellitus                   | 2036                  | 73 (3.59)    | 434                     | 14 (3.23)    | 0.005  | 0.650  |
| Hypertension                        | 2024                  | 49 (2.42)    | 431                     | 11 (2.55)    | 0.002  | 0.842  |
| Psychiatric disorder                | 2039                  | 269 (13.19)  | 436                     | 52 (11.93)   | 0.016  | 0.379  |
| None                                | 2010                  | 1638 (81.49) | 428                     | 353 (82.48)  | -0.013 | 0.555  |
| Primiparous                         | 3285                  | 1505 (45.81) | 645                     | 330 (51.16)  | -0.067 | 0.002  |
| Obstetric history                   |                       |              |                         |              |        |        |
| Preterm delivery                    | 1275                  | 651 (51.06)  | 220                     | 109 (49.55)  | 0.018  | 0.622  |
| Blood transfusion                   |                       | N/A          |                         | N/A          |        |        |
| Cesarean section                    | 990                   | 294 (29.70)  | 164                     | 42 (25.61)   | 0.049  | 0.210  |
| Loss of a pregnancy                 | 1431                  | 79 (5.52)    | 316                     | 12 (4.11)    | 0.012  | 0.559  |
| None                                | 491                   | 293 (59.67)  | 85                      | 31 (36.47)   | 0.024  | 0.809  |
| Current pregnancy                   |                       |              |                         |              |        |        |
| Multiple gestations                 | 3292                  | 121 (3.67)   | 645                     | 18 (2.79)    | 0.014  | 0.115  |

|                                |          |                  |            |          |                  |            |           |          |
|--------------------------------|----------|------------------|------------|----------|------------------|------------|-----------|----------|
| Congenital anomaly             | 2765     | 388 (14.03)      |            | 544      | 68 (12.50)       |            | 0.019     | 0.251    |
| Medical indication             | 3292     |                  |            | 645      |                  |            |           |          |
| Maternal                       |          | 867 (26.34)      |            |          | 204 (31.36)      |            | -0.066    | <0.001   |
| Fetal                          |          | 726 (22.05)      |            |          | 131 (20.31)      |            | 0.022     | 0.234    |
| Other                          |          | 1293 (39.28)     |            |          | 206 (31.94)      |            | 0.091     | <0.001   |
| Unknown                        |          | 509 (15.46)      |            |          | 125 (17.66)      |            | -0.035    | 0.026    |
| Living in a deprived area      | 3292     | 899 (27.31)      |            | 645      | 82 (12.71)       |            | 0.182     | <0.001   |
| <b>Clinical outcomes</b>       | <b>N</b> | <b>n (%)</b>     |            | <b>N</b> | <b>n (%)</b>     |            | <b>MD</b> | <b>P</b> |
| Survival                       |          |                  |            |          |                  |            |           |          |
| Maternal death                 | 3292     | 1 (0.03)         |            | 645      | 0 (0)            |            | 0         | 0.621    |
| Still birth                    | 3263     | 122 (3.74)       |            | 645      | 0 (0)            |            | 0.044     | <0.001   |
| Neonatal death                 | 3028     | 68 (2.25)        |            | 645      | 0 (0)            |            | 0.023     | <0.001   |
| Maternal morbidity             |          |                  |            |          |                  |            |           |          |
| Maternal need for IC           | 3292     | 9 (0.27)         |            | 645      | 0 (0)            |            | 0.003     | 0.138    |
| Late maternal complication     | 3292     | 35 (1.06)        |            | 645      | 6 (0.93)         |            | 0.002     | 0.714    |
| Transfusion                    | 3292     | 155 (4.71)       |            | 645      | 26 (4.03)        |            | 0.008     | 0.365    |
| Neonatal morbidity             |          |                  |            |          |                  |            |           |          |
| Spontaneous preterm birth      | 3240     | 303 (9.35)       |            | 645      | 46 (7.19)        |            | 0.027     | 0.036    |
| Iatrogenic preterm birth       | 3240     | 424 (13.09)      |            | 645      | 59 (9.22)        |            | 0.048     | 0.001    |
| Length of stay                 |          |                  |            |          |                  |            |           |          |
|                                | <b>N</b> | <b>Mean (sd)</b> | <b>Max</b> | <b>N</b> | <b>Mean (sd)</b> | <b>Max</b> |           |          |
| Mother                         | 3292     | 1.28 (1.54)      | 25         | 645      | 1.33 (1.45)      | 10         | -0.062    | 0.363    |
| Neonate                        | 3292     | 3.67 (7.24)      | 28         | 645      | 3.33 (6.51)      | 28         | 0.423     | 0.184    |
| <b>Treatment variables</b>     | <b>N</b> | <b>n (%)</b>     |            | <b>N</b> | <b>n (%)</b>     |            | <b>MD</b> | <b>P</b> |
| Type of delivery               |          |                  |            |          |                  |            |           |          |
| Spontaneous                    | 3292     | 1817 (55.19)     |            | 645      | 343 (53.18)      |            | 0.025     | 0.251    |
| Assisted vaginal               |          | 359 (10.91)      |            |          | 84 (13.02)       |            | -0.026    | 0.054    |
| Cesarean section               |          | 1116 (33.90)     |            |          | 218 (33.80)      |            | 0.001     | 0.951    |
| Start of labor                 |          |                  |            |          |                  |            |           |          |
| Iatrogenic                     | 3245     | 1783 (54.95)     |            | 645      | 369 (57.21)      |            | -0.028    | 0.197    |
| <b>Delivered care services</b> |          |                  |            |          |                  |            |           |          |
|                                | <b>N</b> | <b>Mean (sd)</b> | <b>Max</b> | <b>N</b> | <b>Mean (sd)</b> | <b>Max</b> | <b>MD</b> | <b>P</b> |
| Antenatal admissions           | 3292     | 0.15 0.70        | 6          | 645      | 0.13 (0.43)      | 5          | 0.022     | 0.296    |
| Visits                         | 3292     | 8.86 (7.91)      | 72         | 645      | 10.42 (7.77)     | 44         | -1.943    | <0.001   |
| Multiple centers               |          |                  |            | <b>N</b> | <b>n (%)</b>     |            |           |          |
|                                |          |                  |            | 645      | 336 (52.09)      |            |           |          |

MD mean difference.

Minimum and maximum values of age at delivery for all women and the survey group were 14.17 – 49.45 years and 18.26 – 49.45 years, respectively. Minimum and maximum values of BMI for all women and the survey group were 15.81 – 61.59 kg/m<sup>2</sup> and 16.18 – 52.34 kg/m<sup>2</sup> respectively. Care provision by multiple centers was

patient-reported and therefore not reported for all women. Minimum values of delivered care services and lengths of stay equal zero.
