# Supplementary material for: Patient-reported outcome and experience measures for quality improvement in pregnancy and childbirth care: a retrospective cohort study
Source: PubMed Central journal article supplement — BMJ Open Qual. 2023 Mar 8;12(1):e001922. doi: 10.1136/bmjoq-2022-001922 (PMC10008327; doi:10.1136/bmjoq-2022-001922), 2023-03-08
Supplement: bmjoq-2022-001922supp003.pdf [file bmjoq-2022-001922supp003.pdf]

## Appendix C – Responses based on duration from birth

| PROMs and PREMs        | > 1 year after birth<br>N = 415 |              | < 1 year after birth<br>N = 230 |              | MD     | P     |
|------------------------|---------------------------------|--------------|---------------------------------|--------------|--------|-------|
|                        | N                               | Mean (sd)    | N                               | Mean (sd)    |        |       |
| Health-related QoL     | 415                             | 33.85 (7.68) | 230                             | 34.38 (7.62) | 0.537  | 0.394 |
| Mental health (S)      | 415                             | 1.18 (1.50)  | 230                             | 1.17 (1.47)  | -0.013 | 0.915 |
| Mental health          | 58                              | 17.36 (5.77) | 28                              | 16.75 (5.34) | -0.612 | 0.638 |
| UI (S)                 | 415                             | 0.36 (0.48)  | 230                             | 0.33 (0.47)  | -0.029 | 0.460 |
| Urinary incontinence   | 151                             | 7.34 (3.89)  | 75                              | 6.36 (3.50)  | -0.978 | 0.067 |
| AI (S)                 | 415                             | 0.25 (0.43)  | 230                             | 0.27 (0.44)  | 0.019  | 0.598 |
| Anal incontinence      | 104                             | 2.96 (2.70)  | 61                              | 2.89 (2.22)  | -0.076 | 0.852 |
| Pain with intercourse  | 415                             | 1.41 (1.44)  | 230                             | 1.36 (1.47)  | -0.051 | 0.671 |
| Role confidence        | 415                             | 3.90 (1.11)  | 230                             | 3.90 (1.02)  | -0.003 | 0.972 |
| Birth experience       | 415                             | 27.63 (7.49) | 230                             | 28.10 (7.58) | 0.469  | 0.449 |
| Satisfaction with care | 415                             | 2.89 (0.88)  | 230                             | 2.96 (0.85)  | 0.067  | 0.351 |
| HCR                    | 415                             | 13.67 (3.18) | 230                             | 13.61 (3.47) | -0.052 | 0.847 |
| Continuity of care     | 374                             | 8.55 (2.16)  | 215                             | 8.81 (2.10)  | 0.268  | 0.143 |
| Pain relief            | 415                             | 4.47 (1.36)  | 230                             | 4.51 (1.35)  | 0.048  | 0.668 |
| Partner involvement    | 379                             | 8.18 (1.54)  | 217                             | 8.30 (1.43)  | 0.125  | 0.329 |

Scores on PROMs and PREMs of women who filled in the survey within one year after delivery and women who filled in the survey more than one year after delivery.
