# Supplementary material for: Patient-reported outcome and experience measures for quality improvement in pregnancy and childbirth care: a retrospective cohort study
Source: PubMed Central journal article supplement — BMJ Open Qual. 2023 Mar 8;12(1):e001922. doi: 10.1136/bmjoq-2022-001922 (PMC10008327; doi:10.1136/bmjoq-2022-001922), 2023-03-08
Supplement: bmjoq-2022-001922supp004.pdf [file bmjoq-2022-001922supp004.pdf]

## Appendix D - Effects of patient characteristics, use of care and clinical outcomes on PROMs and PREMs

|                           | Mental health    |                | Urinary incontinence         |                | Anal incontinence |                | HC responsiveness |                | Continuity of care |                | Pain relief                    |                |
|---------------------------|------------------|----------------|------------------------------|----------------|-------------------|----------------|-------------------|----------------|--------------------|----------------|--------------------------------|----------------|
|                           | Suboptimal score |                | Suboptimal score             |                | Suboptimal score  |                | Suboptimal score  |                | Suboptimal score   |                | Suboptimal score               |                |
|                           | OR               | (95% CI)       | OR                           | (95% CI)       | OR                | (95% CI)       | OR                | (95% CI)       | OR                 | (95% CI)       | OR                             | (95% CI)       |
| Vaginal assisted delivery | 1.62             | (0.70 to 3.76) | 1.55                         | (0.83 to 2.89) | 2.88              | (0.13 to 6.60) | 1.19              | (0.63 to 2.24) | 0.86               | (0.41 to 1.81) | 1.25                           | (0.59 to 2.64) |
| Cesarean section          | 1.48             | (0.78 to 2.75) | 0.66                         | (0.37 to 1.17) | 0.47              | (0.19 to 1.18) | 1.23              | (0.76 to 1.99) | 1.16               | (0.68 to 1.98) | 0.89                           | (0.50 to 1.61) |
| Iatrogenic start of labor | 0.60             | (0.32 to 1.12) | 1.06                         | (0.66 to 1.71) | 1.32              | (0.64 to 2.73) | 1.13              | (0.70 to 1.83) | 1.44               | (0.86 to 2.43) | 1.22                           | (0.68 to 2.19) |
| Spontaneous preterm       | 0.84             | (0.27 to 2.63) | 0.57                         | (0.18 to 1.82) | 1.22              | (0.24 to 6.18) | 1.39              | (0.61 to 3.16) | 2.28               | (0.93 to 5.59) | <b>8.83 (3.88 to 20.09)***</b> |                |
| Iatrogenic preterm        | 3.19             | (1.39 to 7.30) | 1.76                         | (0.80 to 3.88) | 2.13              | (0.60 to 7.58) | 1.64              | (0.83 to 3.25) | 0.73               | (0.30 to 1.75) | 2.59                           | (1.19 to 5.65) |
| Maternal length of stay   | 1.16             | (0.97 to 1.37) | 0.90                         | (0.75 to 1.08) | 1.12              | (0.88 to 1.44) | 1.07              | (0.93 to 1.24) | 1.01               | (0.85 to 1.19) | 0.95                           | (0.80 to 1.14) |
| Neonatal length of stay   | 1.03             | (0.99 to 1.07) | 0.97                         | (0.93 to 1.02) | 0.94              | (0.86 to 1.02) | 1.04              | (1.01 to 1.07) | 1.00               | (0.96 to 1.04) | 1.01                           | (0.98 to 1.05) |
| Admissions                | 0.97             | (0.56 to 1.69) | 1.17                         | (0.72 to 1.91) | 0.19              | (0.03 to 1.43) | 1.10              | (0.70 to 1.73) | 0.75               | (0.42 to 1.31) | 0.83                           | (0.47 to 1.48) |
| Visits                    | 1.02             | (0.98 to 1.07) | 1.00                         | (0.97 to 1.04) | 1.02              | (0.96 to 1.09) | 0.98              | (0.95 to 1.02) | 1.01               | (0.97 to 1.05) | 0.96                           | (0.92 to 1.00) |
| Single care center        | 2.05             | (1.06 to 3.96) | 1.15                         | (0.68 to 1.95) | 3.29              | (1.41 to 7.71) | 0.98              | (0.59 to 1.63) | 0.79               | (0.45 to 1.39) | 1.06                           | (0.59 to 1.91) |
| Maternal indication       | 2.39             | (1.25 to 4.55) | 1.47                         | (0.88 to 2.46) | 2.71              | (1.24 to 5.94) | 1.18              | (0.71 to 1.93) | 1.56               | (0.91 to 2.69) | 0.72                           | (0.39 to 1.33) |
| Fetal indication          | 1.28             | (0.61 to 2.65) | 0.90                         | (0.48 to 1.70) | 0.89              | (0.34 to 2.35) | 1.02              | (0.58 to 1.80) | 1.91               | (1.04 to 3.50) | 1.18                           | (0.63 to 2.21) |
| Unknown indication        | 1.79             | (0.81 to 3.97) | 1.03                         | (0.55 to 1.93) | 1.19              | (0.43 to 3.34) | 1.54              | (0.85 to 2.81) | 1.18               | (0.58 to 2.40) | 1.58                           | (0.81 to 3.09) |
| Age                       | 0.96             | (0.91 to 1.02) | <b>1.08 (1.03 to 1.13)**</b> | 1.02           | (0.95 to 1.09)    | 1.02           | (0.98 to 1.06)    | 0.97           | (0.92 to 1.02)     | 1.03           | (0.98 to 1.08)                 |                |
| Primipara                 | 0.86             | (0.49 to 1.51) | 0.79                         | (0.50 to 1.26) | 1.00              | (0.48 to 2.06) | 1.75              | (1.13 to 2.71) | 1.50               | (0.93 to 2.40) | 0.82                           | (0.49 to 1.36) |
| Non-Western               | 2.04             | (1.17 to 3.55) | 1.46                         | (0.92 to 2.34) | 1.54              | (0.75 to 3.18) | 1.52              | (0.97 to 2.38) | 1.13               | (0.68 to 1.87) | 1.15                           | (0.67 to 1.97) |
| Deprived area             | 2.00             | (0.10 to 3.88) | 1.09                         | (0.60 to 2.00) | 1.03              | (0.40 to 2.67) | 1.44              | (0.82 to 2.53) | 2.16               | (1.20 to 3.90) | 1.26                           | (0.63 to 2.51) |
| Limited social network    | 1.98             | (0.94 to 4.17) | 1.52                         | (0.78 to 2.95) | 2.34              | (0.94 to 5.82) | 1.07              | (0.55 to 2.08) | 0.90               | (0.41 to 1.96) | 1.65                           | (0.79 to 3.42) |

OR Odds ratio

CI Confidence interval

\* $P < 0.0056$  \*\* $P < 0.0028$  \*\*\*  $P < 0.0006$  on the basis of Bonferroni correction

## Appendix D - continued

|                           | Health-related QoL               | Birth experience                 | Pain with intercourse        | Role confidence               | Satisfaction with care        |
|---------------------------|----------------------------------|----------------------------------|------------------------------|-------------------------------|-------------------------------|
|                           | Scoring better<br>Coef. (95% CI) | Scoring better<br>Coef. (95% CI) | Scoring worse<br>OR (95% CI) | Scoring better<br>OR (95% CI) | Scoring better<br>OR (95% CI) |
| Vaginal assisted delivery | <b>-2.88 (-4.73 to -1.03)**</b>  | <b>-3.06 (-4.84 to -1.27)**</b>  | <b>2.20 (1.39 to 3.50)**</b> | 0.57 (0.36 to 0.92)           | 0.64 (0.40 to 1.02)           |
| Cesarean section          | -1.38 (-2.84 to 0.07)            | <b>-2.67 (-4.07 to 1.27)***</b>  | 0.95 (0.66 to 1.37)          | 1.09 (0.75 to 1.58)           | 0.81 (0.55 to 1.18)           |
| Iatrogenic start of labor | 0.51 (-0.84 to 1.86)             | -0.10 (-1.41 to 1.20)            | 0.75 (0.53 to 1.06)          | 1.04 (0.74 to 1.48)           | 0.87 (0.62 to 1.23)           |
| Spontaneous preterm       | -1.69 (-4.21 to 0.82)            | -0.72 (-3.15 to 1.70)            | 0.81 (0.43 to 1.53)          | <b>0.30 (0.16 to 0.57)***</b> | 0.78 (0.41 to 1.48)           |
| Iatrogenic preterm        | <b>-3.71 (-5.93 to 1.49)**</b>   | -1.15 (-3.29 to 0.99)            | 0.93 (0.54 to 1.62)          | <b>0.30 (0.16 to 0.53)***</b> | 1.10 (0.62 to 1.96)           |
| Maternal length of stay   | -0.53 (-0.98 to -0.09)           | -0.52 (-0.95 to -0.09)           | 1.06 (0.95 to 1.18)          | 0.87 (0.77 to 0.97)           | 0.92 (0.82 to 1.04)           |
| Neonatal length of stay   | <b>-0.16 (-0.26 to -0.06)**</b>  | -0.11 (-0.21 to -0.01)           | 1.00 (0.98 to 1.03)          | 0.97 (0.94 to 0.99)           | 0.99 (0.96 to 1.02)           |
| Admissions                | 0.75 (0-.66 to 2.16)             | -1.15 (-2.52 to 0.21)            | 1.44 (1.03 to 2.00)          | 0.82 (0.57 to 1.19)           | 1.09 (0.74 to 1.59)           |
| Visits                    | -0.10 (-0.20 to 0.00)            | 0.10 (0.00 to 0.20)              | 0.99 (0.96 to 1.01)          | 1.01 (0.98 to 1.04)           | 0.98 (0.96 to 1.01)           |
| Single care center        | -1.29 (-2.75 to 0.18)            | -0.49 (-1.90 to 0.92)            | 1.12 (0.77 to 1.63)          | 1.18 (0.80 to 1.73)           | 0.86 (0.59 to 1.26)           |
| Maternal indication       | <b>-2.53 (-3.97 to -1.09)**</b>  | -0.80 (-2.19 to 0.60)            | 1.15 (0.80 to 1.67)          | 0.73 (0.50 to 1.06)           | 0.78 (0.53 to 1.14)           |
| Fetal indication          | -0.15 (-1.81 to 1.50)            | -0.06 (-1.65 to 1.53)            | 0.94 (0.62 to 1.42)          | 0.67 (0.44 to 1.03)           | 0.82 (0.54 to 1.26)           |
| Unknown indication        | -1.89 (-3.63 to -0.16)           | -0.81 (-2.48 to 0.87)            | 1.19 (0.77 to 1.85)          | 0.60 (0.38 to 0.94)           | 0.87 (0.55 to 1.37)           |
| Age                       | 0.06 (-0.07 to 0.19)             | 0.01 (-0.11 to 0.14)             | 1.00 (0.97 to 1.03)          | 0.99 (0.96 to 1.03)           | 1.03 (0.99 to 1.06)           |
| Primipara                 | -0.03 (-1.29 to 1.22)            | -1.26 (-2.46 to -0.05)           | 1.50 (1.09 to 2.05)          | <b>0.35 (0.25 to 0.49)***</b> | 0.88 (0.64 to 1.22)           |
| Non-Western               | -1.13 (-2.50 to 0.23)            | -0.88 (-2.19 to 0.43)            | 1.36 (0.96 to 1.92)          | 0.91 (0.64 to 1.30)           | 0.93 (0.65 to 1.32)           |
| Deprived area             | -1.03 (-2.77 to 0.71)            | <b>-3.17 (-4.85 to -1.49)***</b> | 1.54 (0.99 to 2.39)          | 1.27 (0.80 to 2.01)           | 0.53 (0.33 to 0.83)           |
| Limited social network    | -2.61 (-4.66 to -0.57)           | -2.56 (-4.53 to -0.59)           | <b>2.13 (1.28 to 3.57)*</b>  | 0.61 (0.36 to 1.04)           | 0.48 (0.28 to 0.81)           |

OR Odds ratio

CI Confidence interval

Coef. Coefficient

\* $P < 0.0056$  \*\* $P < 0.0028$  \*\*\*  $P < 0.0006$  on the basis of Bonferroni correction
